# Supplementary material
Source: MDPI journal article supplement (https://www.mdpi.com/2571-6255/5/2/51)
Supplement: s1 [file s1]

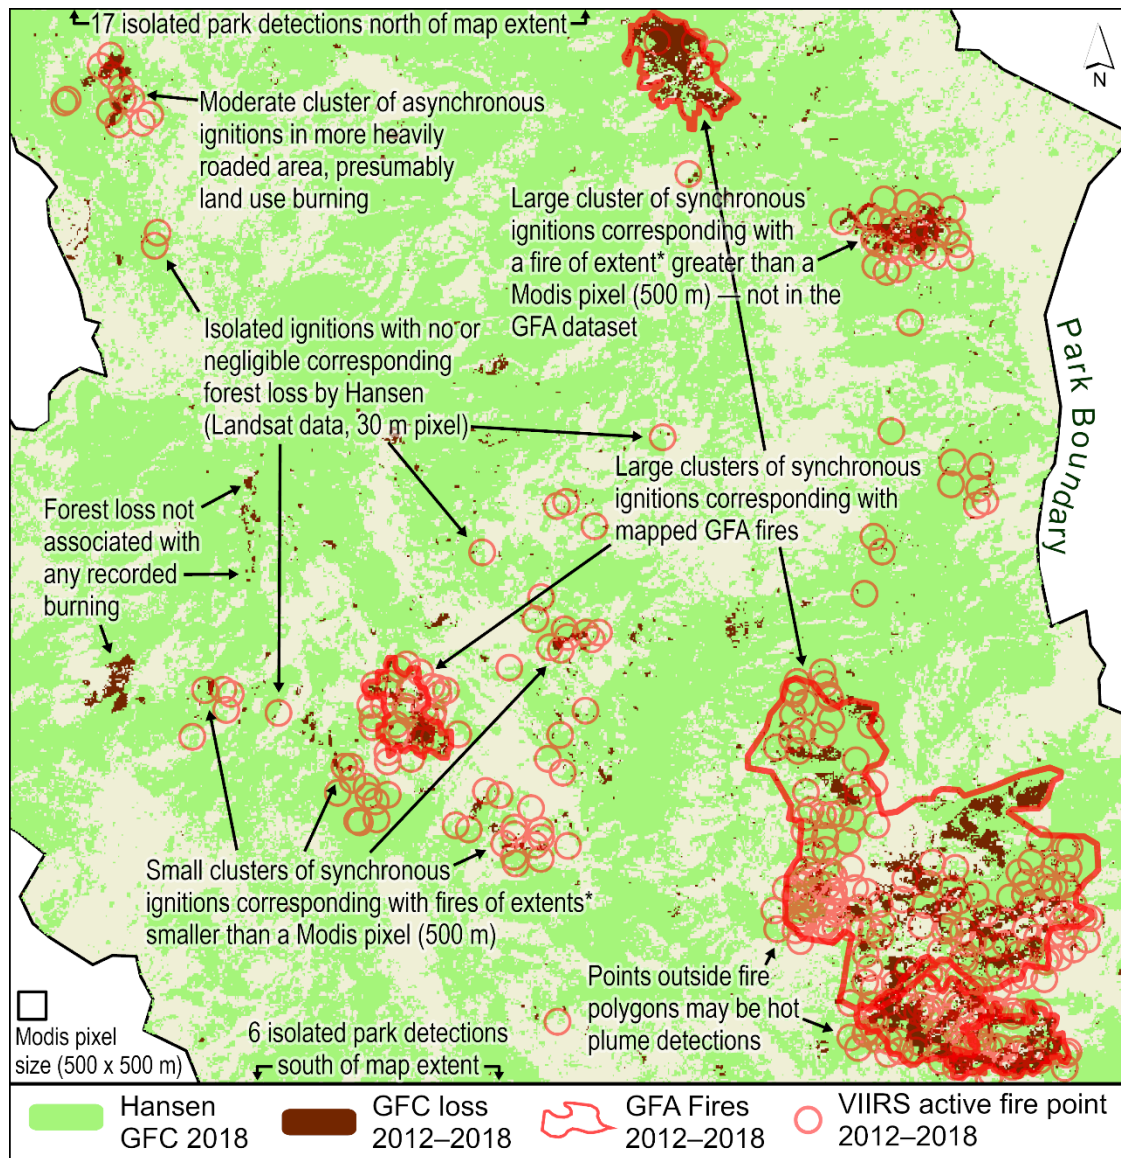

**Figure S1.** Analysis of forest loss and fires from the Near real-time (NRT) Suomi National Polar-orbiting Partnership Visible Infrared Imaging Radiometer Suite (S-NPP/VIIRS) Active Fire detection product (VNP14IMGTDL\_NRT) at a 375 m resolution. The improved spatial resolution and high fidelity of the VIIRS NRT active fire data product (<https://earthdata.nasa.gov/earth-observation-data/near-real-time/firms/v1-vnp14imgt>, accessed on 8 April 2022) results in a significantly greater quantity of detected fires relative to MODIS-based fire products. Approximately 70 distinct fires (isolated points and synchronous clusters) were detected in the park for the period 2012–2018. Most isolated fire detection points correspond with zero to a few pixels (Landsat resolution, 30 m) of recorded Hansen forest loss over the same analysis period. A few synchronous point clusters correspond with larger fragments of Hansen forest loss, but still at a scale much finer than our MODIS pixel analysis level. One large cluster of VIIRS active fire points corresponds with a 2012 (August) fire with an

extent exceeding one MODIS pixel. That fire was mapped and assessed for burn severity and other fire parameters consistent with GFA fires (Table 2). \*Extents of clustered, synchronous VIIRS fire points outside GFA fires were visually assessed by cross-referencing Landsat imagery before and after burning.

**Table S1.** Fire parameters (*c.f.* Table 2) of the 12 August 2012 VIIRS detected, non-GFA dataset fire identified in Figure S1. Landsat imagery used to assess fire severity (RdNBR): 7 August 2012 (pre-fire; Landsat 7); 18 August 2013 (post-fire; Landsat 8).

|                                                      |        |
|------------------------------------------------------|--------|
| Year of fire                                         | 2012   |
| Landsat-RdNBR digitized fire area                    | 191 ha |
| Landsat-RdNBR forested                               | 162 ha |
| GFC loss within Landsat-RdNBR fire                   | 53 ha  |
| Landsat-RdNBR forested, high severity                | 3 ha   |
| <i>Abies/Pinus</i> forest loss to high severity fire | 0 ha   |
